# Supplementary material for: Effectiveness of CHIKV vaccine VLA1553 demonstrated by passive transfer of human sera
Source: PubMed Central journal article supplement (PMC9431671; doi:10.1172/jci.insight.160173), 2022-07-22
Supplement: jciinsight-7-160173-s115.pdf [file jciinsight-7-160173-s115.pdf]

## Supplemental material

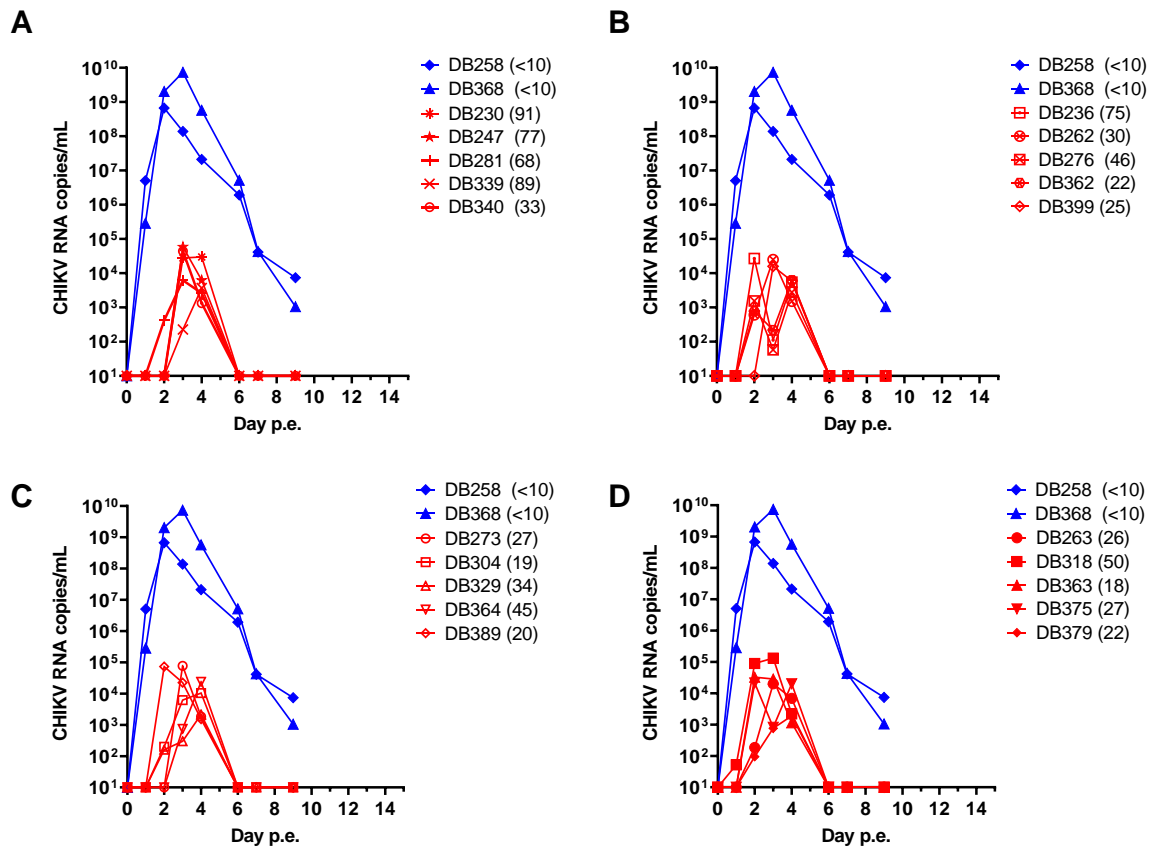

**Figure S 1: Plasma viral load of individual animals.** Viral load was determined in individual animals. The same control animals DB258 and DB368 receiving non-immune sera (<10  $\mu$ PRNT<sub>50</sub>) are shown for all four panels in blue. The other animals receiving VLA1553-specific serum **A**. HS d14 (titer range 33-91  $\mu$ PRNT<sub>50</sub>) **B**. MHS d84 (titer range 22-75  $\mu$ PRNT<sub>50</sub>) **C**. MS d180 (titer range 19-45  $\mu$ PRNT<sub>50</sub>) and **D**. HS d180 (titer range 18-50  $\mu$ PRNT<sub>50</sub>) are shown in red.  $\mu$ PRNT<sub>50</sub> titer for the individual animal is shown in brackets. LLOQ: 500 RNA copies/mL, LLOD: 60 RNA copies/mL (5 copies/reaction). p.e.: post-exposure.

**Table S 1: Neutralizing antibody titers ( $\mu$ PRNT<sub>50</sub>) of individual NHPs and peak viremia titers (copies/mL) after WT CHIKV challenge.  $\mu$ PRNT<sub>50</sub> titers prior to WT**

CHIKV challenge were measured by Nexelis using an Asian genotype, the live-attenuated CHIKV vaccine strain TSI-GSD-218 or 181/clone 25 developed by the Walter Reed Army Institute of Research (WRAIR, US). Viremia was determined using RT-qPCR.

|                   |           | Day -1 (*Day -6)                  | Day 0                             | Day 2-6                     |                           |
|-------------------|-----------|-----------------------------------|-----------------------------------|-----------------------------|---------------------------|
| Serum transferred | Sample ID | $\mu$ PRNT <sub>50</sub><br>titer | $\mu$ PRNT <sub>50</sub><br>titer | Viremia peak<br>(copies/mL) | Day of<br>peak<br>viremia |
| Control           | BT337     | <10                               | <10                               | $7.00 \times 10^7$          | Day 3                     |
|                   | MF1508    | <10                               | <10                               | $8.5 \times 10^8$           | Day 2                     |
|                   | DB229     | <10                               | <10                               | $1.00 \times 10^9$          | Day 3                     |
|                   | DB257     | <10                               | <10                               | $1.70 \times 10^9$          | Day 2                     |
| ULS d28           | DB277     | <10                               | 10                                | $7.79 \times 10^2$          | Day 3                     |
|                   | DB295     | <10                               | 15                                | $2.10 \times 10^5$          | Day 4                     |
|                   | DB311     | <10                               | 15                                | $6.20 \times 10^1$          | Day 3                     |
|                   | DB315     | <10                               | 13                                | $3.50 \times 10^5$          | Day 6                     |
|                   | DB316     | <10                               | 12                                | $1.90 \times 10^3$          | Day 3                     |
| LS d28            | MF1401    | <10                               | 17                                | $8.35 \times 10^2$          | Day 2                     |
|                   | MF1402    | <10                               | 20                                | $8.07 \times 10^2$          | Day 2                     |
|                   | BV256     | <10                               | 26                                | $5.87 \times 10^3$          | Day 3                     |
|                   | CD876     | <10                               | 14                                | $4.08 \times 10^3$          | Day 3                     |
|                   | CG181     | <10                               | 22                                | $1.04 \times 10^3$          | Day 3                     |
| MS d28            | MF1403    | <10                               | 37                                | $3.22 \times 10^3$          | Day 2                     |
|                   | MF1404    | <10                               | 82                                | $8.96 \times 10^3$          | Day 3                     |
|                   | BT913     | <10                               | 52                                | $5.07 \times 10^2$          | Day 3                     |
|                   | BT914     | <10                               | 31                                | 0                           | Day 3                     |
|                   | BU365     | <10                               | 21                                | $4.45 \times 10^3$          | Day 3                     |
| HS d28            | DB322     | <10                               | 103                               | $7.00 \times 10^1$          | Day 3                     |
|                   | DB355     | <10                               | 155                               | 0                           | Day 3                     |

|                   |           | Day -1 (*Day -6)                  | Day 0                             | Day 2-6                     |                           |
|-------------------|-----------|-----------------------------------|-----------------------------------|-----------------------------|---------------------------|
| Serum transferred | Sample ID | $\mu$ PRNT <sub>50</sub><br>titer | $\mu$ PRNT <sub>50</sub><br>titer | Viremia peak<br>(copies/mL) | Day of<br>peak<br>viremia |
|                   | DB366     | <10                               | 155                               | 0                           | Day 3                     |
|                   | DB367     | <10                               | 109                               | 0                           | Day 3                     |
|                   | DB374     | <10                               | 82                                | 0                           | Day 3                     |
| MHS d84           | DB236     | <10*                              | 75                                | $2.69 \times 10^4$          | Day 2                     |
|                   | DB262     | <10*                              | 30                                | $2.48 \times 10^4$          | Day 3                     |
|                   | DB276     | <10*                              | 46                                | $2.78 \times 10^3$          | Day 4                     |
|                   | DB362     | <10*                              | 22                                | $6.22 \times 10^3$          | Day 4                     |
|                   | DB399     | <10*                              | 25                                | $1.59 \times 10^4$          | Day 3                     |
| HS d14            | DB230     | <10*                              | 91                                | $2.98 \times 10^4$          | Day 4                     |
|                   | DB247     | <10*                              | 77                                | $5.87 \times 10^4$          | Day 3                     |
|                   | DB281     | <10*                              | 68                                | $6.19 \times 10^3$          | Day 3                     |
|                   | DB339     | <10*                              | 89                                | $3.69 \times 10^3$          | Day 4                     |
|                   | DB340     | <10*                              | 33                                | $4.39 \times 10^4$          | Day 3                     |
| Control           | DB258     | <10*                              | <10                               | $6.70 \times 10^8$          | Day 2                     |
|                   | DB368     | <10*                              | <10                               | $7.40 \times 10^9$          | Day 3                     |
| MS d180           | DB273     | <10*                              | 27                                | $7.70 \times 10^4$          | Day 3                     |
|                   | DB304     | <10*                              | 19                                | $1.04 \times 10^4$          | Day 4                     |
|                   | DB329     | <10*                              | 34                                | $2.14 \times 10^3$          | Day 4                     |
|                   | DB364     | 29                                | 45                                | $2.38 \times 10^4$          | Day 4                     |
|                   | DB389     | <10*                              | 20                                | $7.31 \times 10^4$          | Day 2                     |
| HS d180           | DB263     | <10*                              | 26                                | $2.00 \times 10^4$          | Day 3                     |
|                   | DB318     | <10*                              | 50                                | $1.32 \times 10^5$          | Day 3                     |
|                   | DB363     | <10*                              | 18                                | $3.27 \times 10^4$          | Day 2                     |
|                   | DB375     | <10*                              | 27                                | $2.13 \times 10^4$          | Day 2                     |
|                   | DB379     | <10*                              | 22                                | $1.89 \times 10^3$          | Day 4                     |

**Table S 2: TCID<sub>50</sub> titers at time of peak viremia and post peak viremia.** NHP plasma samples from control animals receiving non-immune serum and VLA1553 Phase 1 serum treated animals were analyzed at peak viremia (day 2 and 3 p.e.), day 4 p.e. and post-peak viremia (day 6 and 7 p.e.). Replicating CHIKV was determined in a conventional Vero-cell based TCID<sub>50</sub> assays or with a pre-amplification step on mosquito cells for detection of replicating CHIKV in expected low titer samples.

| Treatment group              | Animals | Serum                  | Day p.e. | copies/mL | TCID <sub>50</sub> /mL   |
|------------------------------|---------|------------------------|----------|-----------|--------------------------|
| Controls                     | BT337   | human non-immune serum | 2        | 5.79E+07  | 3.50 × 10 <sup>5</sup> * |
|                              | BT337   |                        | 2        | 5.80E+07  | 3.16 × 10 <sup>5</sup>   |
|                              | BT337   |                        | 3        | 7.00E+07  | 4.22 × 10 <sup>4</sup>   |
|                              | BT337   |                        | 4        | 3.50E+06  | n.d.                     |
|                              | DB229   |                        | 2        | 8.70E+08  | 2.37 × 10 <sup>6</sup>   |
|                              | DB229   |                        | 3        | 1.00E+09  | 7.50 × 10 <sup>5</sup>   |
|                              | DB229   |                        | 4        | 7.00E+06  | 6.25 × 10 <sup>3</sup>   |
|                              | DB229   |                        | 7        | 4.40E+05  | n.d.                     |
|                              | DB258   |                        | 6        | 1.92E+06  | n.d. *                   |
|                              | MF1508  |                        | 2        | 8.50E+08  | 1.78 × 10 <sup>6</sup>   |
|                              | MF1508  |                        | 6        | 1.70E+05  | n.d.                     |
|                              | DB257   |                        | 2        | 1.70E+09  | 2.37 × 10 <sup>6</sup>   |
|                              | DB257   |                        | 3        | 9.30E+08  | 1.78 × 10 <sup>6</sup>   |
|                              | DB257   |                        | 7        | 2.10E+04  | n.d.                     |
| VLA1553-specific human serum | BV256   | MS d28                 | 3        | 5.87E+03  | n.d. *                   |
|                              | MF1404  | LS d28                 | 3        | 8.96E+03  | n.d. *                   |
|                              | DB295   | ULS d28                | 3        | 9.30E+03  | n.d. *                   |
|                              | DB295   |                        | 4        | 2.08E+05  | n.d. *                   |

|       |         |   |          |        |
|-------|---------|---|----------|--------|
| DB295 |         | 6 | 5.52E+04 | n.d. * |
| DB315 |         | 7 | 2.46E+04 | n.d. * |
| DB315 |         | 9 | 1.98E+03 | n.d. * |
| DB230 | HS d14  | 3 | 2.98E+04 | n.d. * |
| DB340 |         | 3 | 4.40E+04 | n.d. * |
| DB247 |         | 3 | 5.87E+04 | n.d. * |
| DB281 |         | 3 | 6.19E+03 | n.d. * |
| DB262 | MHS d84 | 3 | 2.48E+04 | n.d. * |
| DB399 |         | 3 | 1.59E+04 | n.d. * |
| DB364 | MS d180 | 4 | 2.38E+04 | n.d. * |
| DB304 |         | 4 | 1.04E+04 | n.d. * |
| DB363 | HS d180 | 2 | 3.27E+04 | n.d. * |
| DB375 |         | 4 | 2.00E+04 | n.d. * |
| DB263 |         | 3 | 2.00E+04 | n.d. * |
| DB318 |         | 3 | 1.32E+05 | n.d. * |

p.e.: post-exposure; n.d.: not-detectable; HS: high titer serum; MHS: medium high titer serum; MS: medium titer serum; LS: low titer serum; ULS: ultra-low titer serum.

\*, TCID<sub>50</sub> assay with a pre-amplification step on mosquito cells.

**A**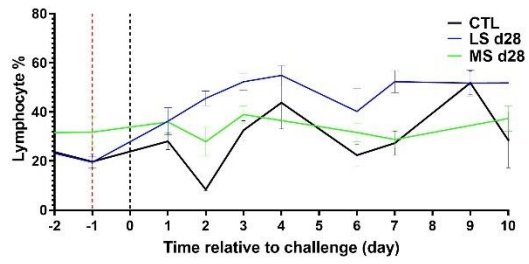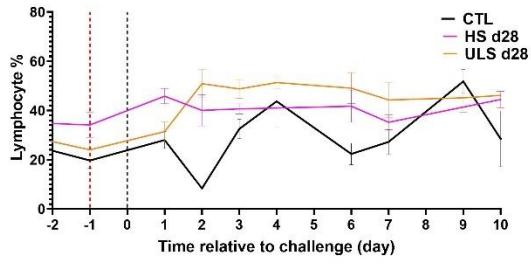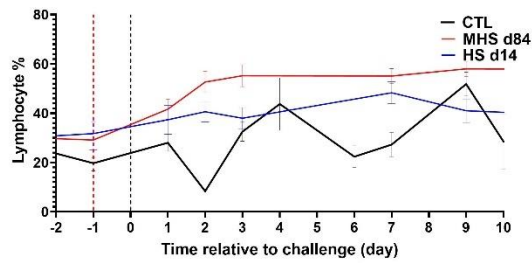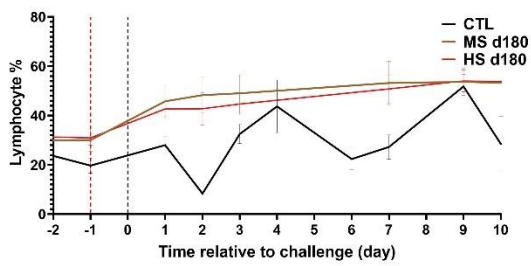**B**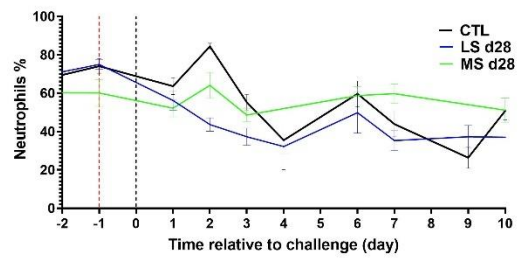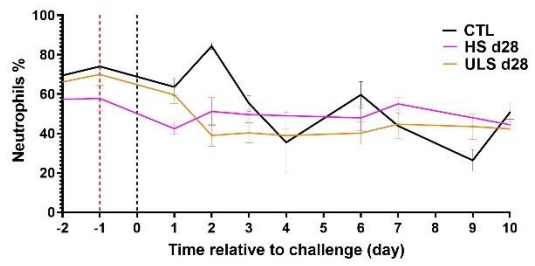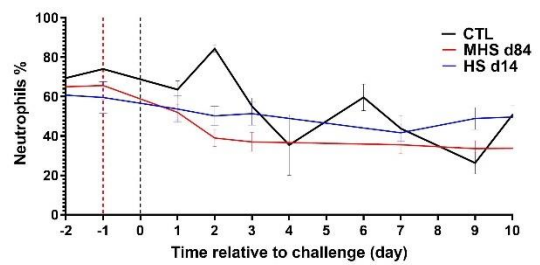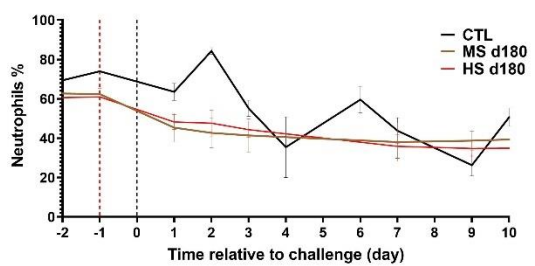

**Figure S 2: Cell blood counts post WT CHIKV challenge.** Cell blood counts were compared between animals receiving VLA1553 Phase 1 serum and NHPs receiving human non-immune serum (CTL, black lines) prior to WT CHIKV challenge. Data represent Mean  $\pm$  standard deviation of percentages of **A.** lymphocytes, the same six control animals (CTL) are shown on all four graphs and **B.** neutrophils within animals from each group, the same six control animals (CTL) are shown on all four graphs.

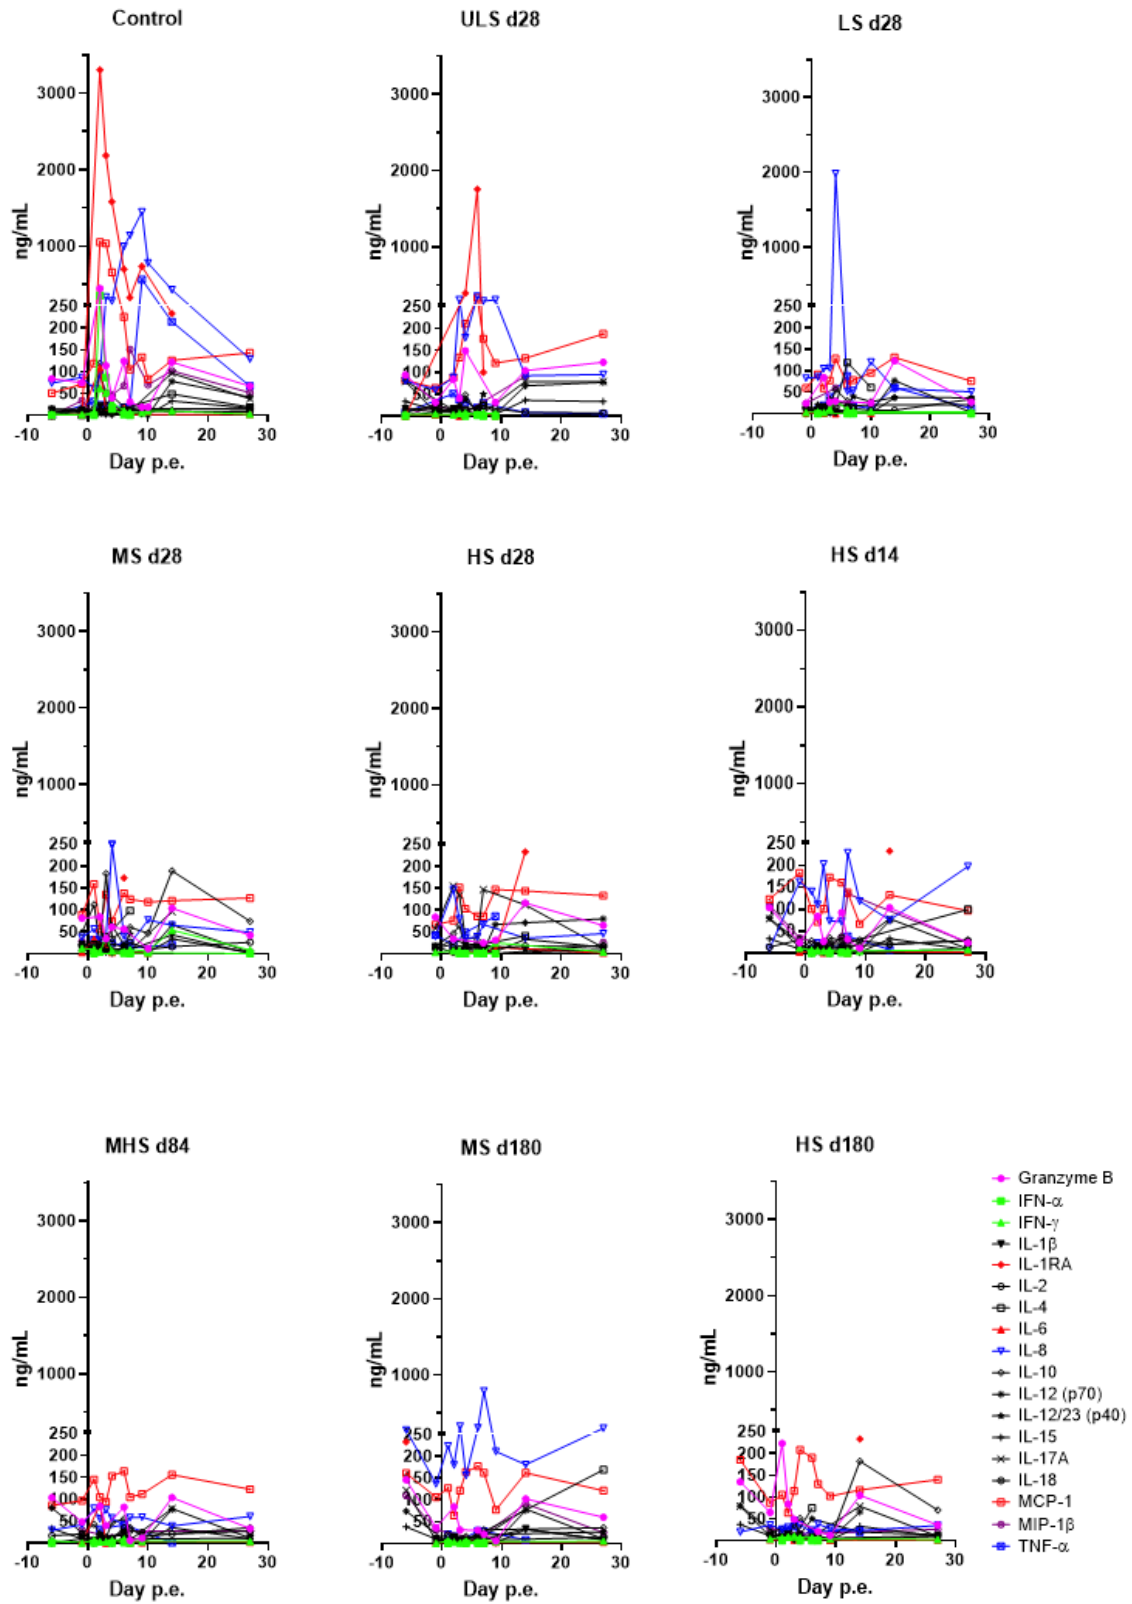



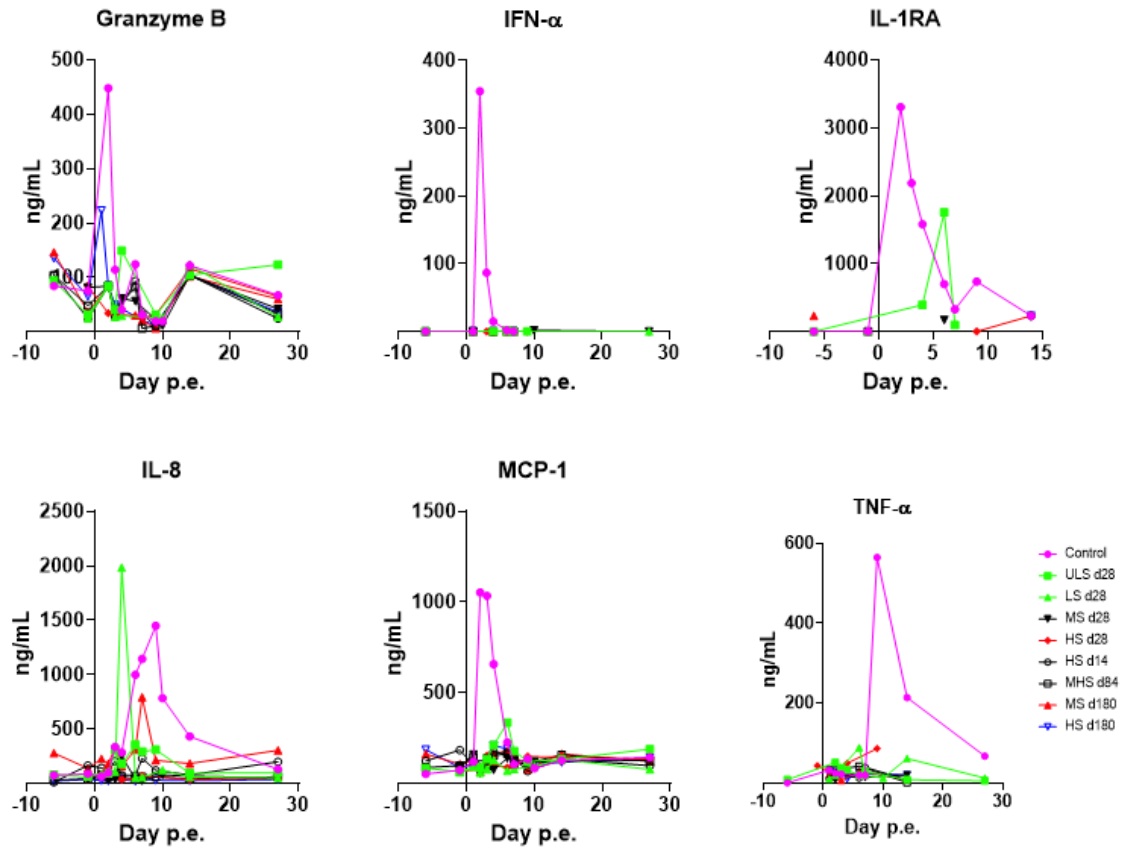

**Figure S 3: Expression of inflammatory markers.** Comparison of inflammatory response in VLA1553 Phase 1 and non-immune serum treated NHPs. IFN- $\gamma$ , IL-2, IL-4, IL-6, IL-8, IL-10, IL-12/IL-13 (p40), IL-18 and TNF- $\alpha$  were measured using the Milliplex system and Granzyme B, IFN- $\alpha$ , IL-1 $\beta$ , IL-1RA, IL-12 (p70), IL-15, IL-17A, MCP-1 and MIP-1 $\beta$  were measured using the ProcartaPlex system. p.e.: post-exposure.

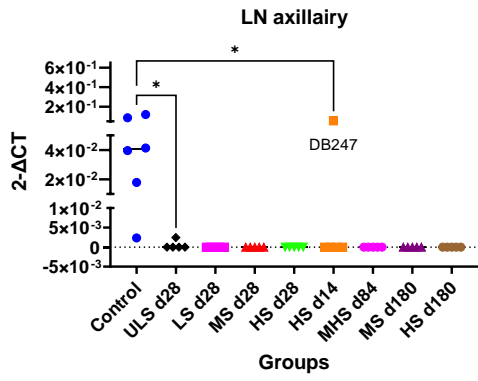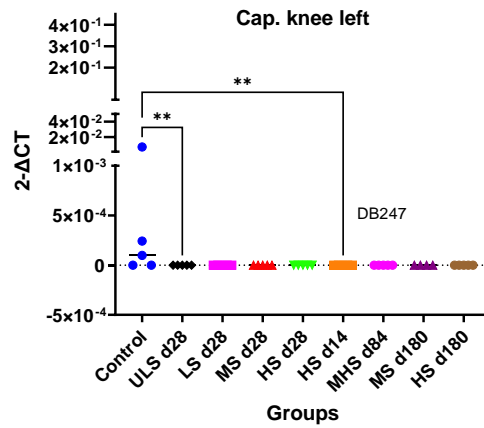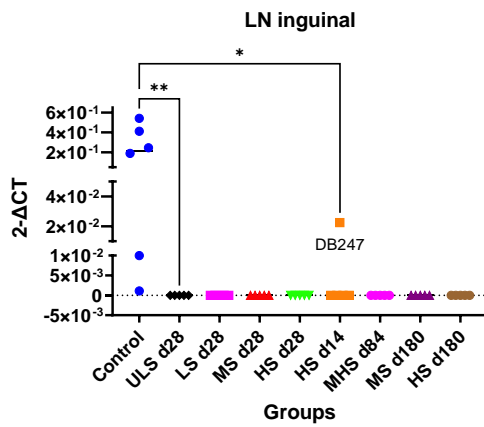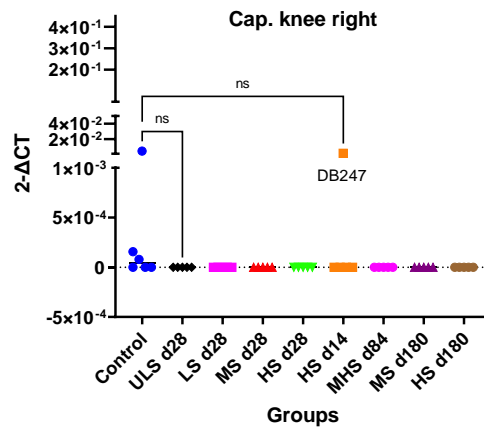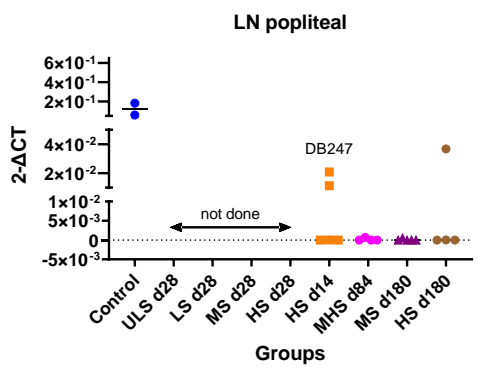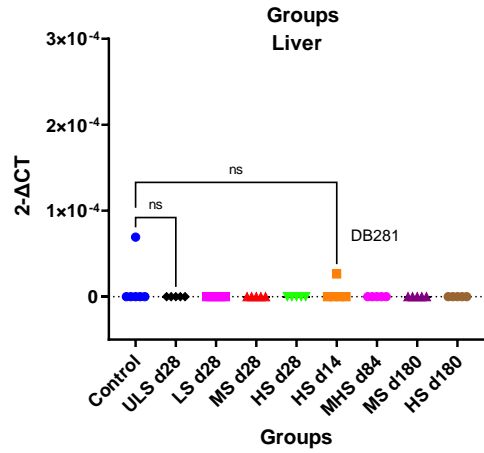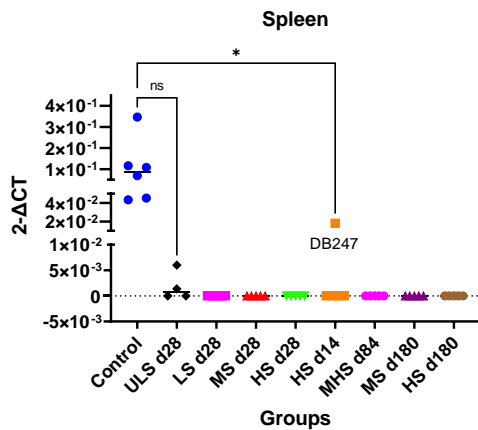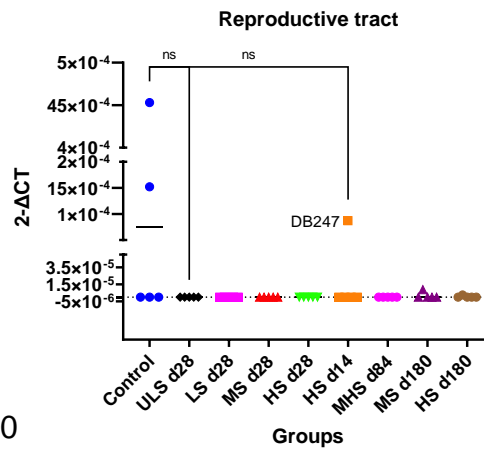

**Figure S 4: CHIKV RNA titers in tissues day 28 post challenge.** Results are expressed as the ratio CHIKV RNA / GAPDH RNA =  $2^{-\Delta CT}$ . The median is plotted. Human non-immune sera injected animals are shown in blue; animals receiving the LS d28 shown in square pink; animals receiving MS d28 shown in red; animals receiving ULS d28 shown in black; animals receiving HS d28 shown in bright green; animals receiving HS d14 shown in orange; animals receiving day 84 medium high titer sera shown in round pink (MHS d84); animals receiving MS d180 are shown in purple and animals receiving HS d180 are shown in brown. ANOVA non parametric Kruskal-Wallis test  $p < 0.0001$ ; post test Dunn's multiple comparisons: \*  $p < 0.05$ ; \*\*  $p < 0.01$ , \*\*\*  $p < 0.001$ . To note, for reproductive tract, results are combined values from vagina of the female and seminal vesicle from the male. Below limit of quantification (CHIKV Cq  $\geq 35$ ), below limit of detection ( $1E-07$ ). LN: lymph node; cap.: capsule

**Table S 3: Sera from Yoon *et al.*, 2015 tested in  $\mu$ PRNT compared to PRNT<sub>50</sub> or PRNT<sub>80</sub> titers reported by AFRIMS.**

| Sample ID                   | $\mu$ PRNT <sub>50</sub> | PRNT <sub>80</sub> Titer | Ratio                                        |
|-----------------------------|--------------------------|--------------------------|----------------------------------------------|
|                             | Valneva                  | AFRIMS                   | $\mu$ PRNT <sub>50</sub> /PRNT <sub>80</sub> |
| CPC C 0004 00 Y01 S01 B 001 | <20                      | <10                      | -                                            |
| CPC C 0004 00 Y02 S02 B 002 | 299                      | 64                       | 4.67                                         |
| CPC C 0047 00 Y01 S01 B 001 | <20                      | <10                      | -                                            |
| CPC C 0047 00 Y02 S02 B 002 | 2086                     | 537                      | 3.88                                         |
| CPC C 0092 00 Y01 S01 B 001 | <20                      | <10                      | -                                            |
| CPC C 0092 00 Y02 S02 B 002 | 1075                     | 415                      | 2.59                                         |
| CPC C 0097 00 Y01 S01 B 001 | <20                      | <10                      | -                                            |
| CPC C 0097 00 Y02 S02 B 002 | 2621                     | 661                      | 3.97                                         |
| CPC C 0139 00 Y01 S01 B 001 | <20                      | <10                      | -                                            |
| CPC C 0139 00 Y02 S02 B 002 | 1216                     | 408                      | 2.98                                         |
| CPC C 0147 00 Y01 S01 B 001 | <20                      | <10                      | -                                            |
| CPC C 0147 00 Y02 S02 B 002 | 1208                     | 425                      | 2.84                                         |
| CPC C 0175 00 Y01 S01 B 001 | <20                      | <10                      | -                                            |
| CPC C 0175 00 Y02 S02 B 002 | 576                      | 111                      | 5.19                                         |
| CPC C 0178 00 Y01 S01 B 001 | <20                      | <10                      | -                                            |
| CPC C 0178 00 Y02 S02 B 002 | 2417                     | 625                      | 3.87                                         |
| CPC C 0273 00 Y01 S01 B 001 | <20                      | <10                      | -                                            |
| CPC C 0273 00 Y02 S02 B 002 | 2143                     | 811                      | 2.64                                         |
| CPC C 0406 00 Y01 S01 B 001 | <20                      | <10                      | -                                            |
| CPC C 0406 00 Y02 S02 B 002 | 5297                     | 569                      | 9.31                                         |
| CPC C 0458 00 Y01 S01 B 001 | <20                      | <10                      | -                                            |
| CPC C 0458 00 Y02 S02 B 002 | 804                      | 238                      | 3.38                                         |
| CPC C 0658 00 Y01 S01 B 001 | <20                      | <10                      | -                                            |
| CPC C 0658 00 Y02 S02 B 002 | 1808                     | 488                      | 3.70                                         |
| CPC C 0673 00 Y01 S01 B 001 | <20                      | <10                      | -                                            |
| CPC C 0673 00 Y02 S02 B 002 | 3105                     | 3347                     | 0.93                                         |

| Sample ID                   | $\mu$ PRNT <sub>50</sub> | PRNT <sub>80</sub> Titer | Ratio                                        |
|-----------------------------|--------------------------|--------------------------|----------------------------------------------|
|                             | Valneva                  | AFRIMS                   | $\mu$ PRNT <sub>50</sub> /PRNT <sub>80</sub> |
| CPC C 0751 00 Y01 S01 B 001 | <20                      | <10                      | -                                            |
| CPC C 0751 00 Y02 S02 B 002 | 289                      | 122                      | 2.37                                         |
| CPC C 0757 00 Y01 S01 B 001 | <20                      | <10                      | -                                            |
| CPC C 0757 00 Y02 S02 B 002 | 1199                     | 337                      | 3.56                                         |
| CPC C 0857 00 Y01 S01 B 001 | <20                      | <10                      | -                                            |
| CPC C 0857 00 Y02 S02 B 002 | 2824                     | 1088                     | 2.60                                         |
| CPC C 0879 00 Y01 S01 B 001 | <20                      | <10                      | -                                            |
| CPC C 0879 00 Y02 S02 B 002 | 2904                     | 347                      | 8.37                                         |
| CPC C 0901 00 Y01 S01 B 001 | <20                      | <10                      | -                                            |
| CPC C 0901 00 Y02 S02 B 002 | 355                      | 86                       | 4.13                                         |
| CPC C 0043 00 Y01 S01 B 001 | 1019                     | 284                      | 3.59                                         |
| CPC C 0043 00 Y02 S02 B 002 | 1514                     | 390                      | 3.88                                         |
| CPC C 0114 00 Y01 S01 B 001 | 1266                     | 705                      | 1.80                                         |
| CPC C 0114 00 Y02 S02 B 002 | 1875                     | 717                      | 2.61                                         |
| CPC C 0190 00 Y01 S01 B 001 | 299                      | 158                      | 1.89                                         |
| CPC C 0190 00 Y02 S02 B 002 | 170                      | 203                      | 0.84                                         |
| CPC C 0278 00 Y01 S01 B 001 | <20                      | <10                      | -                                            |
| CPC C 0278 00 Y02 S02 B 002 | 2454                     | 1228                     | 2.00                                         |
| CPC C 0421 00 Y01 S01 B 001 | 694                      | 97                       | 7.15                                         |
| CPC C 0421 00 Y02 S02 B 002 | 349                      | 147                      | 2.38                                         |
| CPC C 0567 00 Y01 S01 B 001 | <20                      | <10                      | -                                            |
| CPC C 0567 00 Y02 S02 B 002 | 942                      | 116                      | 8.12                                         |
| CPC C 0607 00 Y01 S01 B 001 | <20                      | <10                      | -                                            |
| CPC C 0607 00 Y02 S02 B 002 | 2971                     | 420                      | 7.07                                         |
| CPC C 0653 00 Y01 S01 B 001 | 3135                     | 225                      | 13.93                                        |
| CPC C 0653 00 Y02 S02 B 002 | 1409                     | 290                      | 4.86                                         |
| CPC C 0688 00 Y01 S01 B 001 | <20                      | <10                      | -                                            |
| CPC C 0688 00 Y02 S02 B 002 | 4136                     | 2372                     | 1.74                                         |

| Sample ID                   | $\mu$ PRNT <sub>50</sub> | PRNT <sub>80</sub> Titer                   | Ratio                                        |
|-----------------------------|--------------------------|--------------------------------------------|----------------------------------------------|
|                             | Valneva                  | AFRIMS                                     | $\mu$ PRNT <sub>50</sub> /PRNT <sub>80</sub> |
| CPC C 0699 00 Y01 S01 B 001 | <20                      | <10                                        | -                                            |
| CPC C 0699 00 Y02 S02 B 002 | 3903                     | 346                                        | 11.28                                        |
| CPC C 0740 00 Y01 S01 B 001 | <20                      | <10                                        | -                                            |
| CPC C 0740 00 Y02 S02 B 002 | 2001                     | 297                                        | 6.74                                         |
| CPC C 0814 00 Y01 S01 B 001 | <20                      | <10                                        | -                                            |
| CPC C 0814 00 Y02 S02 B 002 | 1745                     | 544                                        | 3.21                                         |
| CPC C 0834 00 Y01 S01 B 001 | <20                      | <10                                        | -                                            |
| CPC C 0834 00 Y02 S02 B 002 | 5133                     | 674                                        | 7.62                                         |
| CPC C 0847 00 Y01 S01 B 001 | <20                      | <10                                        | -                                            |
| CPC C 0847 00 Y02 S02 B 002 | 2263                     | 602                                        | 3.76                                         |
| CPC C 0950 00 Y01 S01 B 001 | 702                      | 140                                        | 5.01                                         |
| CPC C 0950 00 Y02 S02 B 002 | 810                      | 236                                        | 3.43                                         |
|                             |                          | <b>GMR</b>                                 | <b>3.73</b>                                  |
|                             |                          | <b>Lower 99% CI of<br/>geo. mean ratio</b> | <b>2.86</b>                                  |
|                             |                          | <b>Upper 99% CI of<br/>geo. mean ratio</b> | <b>4.87</b>                                  |

PRNT: plaque reduction neutralization test;  $\mu$ PRNT<sub>50</sub>: neutralization titer determined in a microneutralization assay (96 well format) using a 50% plaque reduction; PRNT<sub>80</sub>: neutralization titer using a 80% plaque reduction; CI: confidence interval; GMR: geometric mean ratio.
